# Supplementary material
Source: PubMed Central journal article supplement (PMC3535678)
Supplement: NIHMS419317-supplement-Supp_FigureS1-S3_TableS1-S4.pdf [file NIHMS419317-supplement-Supp_FigureS1-S3_TableS1-S4.pdf]

**SUPPLEMENTARY MATERIAL**

**Table S1.** Regulation of the *cepR2* and *cepS* promoters.

| Fusion <sup>a</sup> | Fragment <sup>b</sup> | Chromosomal genotype <sup>c</sup> | OHL (uM) | β-Galactosidase | Induction Ratio |
|---------------------|-----------------------|-----------------------------------|----------|-----------------|-----------------|
| <i>PcepR2-lacZ</i>  | -195 - +170           | WT                                | 0        | 237 ± 8         | (1)             |
|                     |                       | WT                                | 1        | 480 ± 30        | 2.0             |
|                     |                       | GR141 ( <i>cepR2</i> )            | 0        | 247 ± 23        | 1.0             |
|                     |                       | GR141 ( <i>cepR2</i> )            | 1        | 446 ± 26        | 1.9             |
|                     |                       | GR145 ( <i>cepS</i> )             | 0        | 116 ± 13        | 0.5             |
|                     |                       | GR145 ( <i>cepS</i> )             | 1        | 126 ± 12        | 0.5             |
| <i>PcepS-lacZ</i>   | -198 - +127           | WT                                | 0        | 264 ± 23        | (1)             |
|                     |                       | WT                                | 1        | 468 ± 35        | 1.8             |
|                     |                       | GR141 ( <i>cepR2</i> )            | 0        | 237 ± 17        | 0.9             |
|                     |                       | GR141 ( <i>cepR2</i> )            | 1        | 482 ± 32        | 1.8             |
|                     |                       | GR145 ( <i>cepS</i> )             | 0        | 172 ± 14        | 0.7             |
|                     |                       | GR145 ( <i>cepS</i> )             | 1        | 155 ± 21        | 0.6             |

a: The *cepR2-lacZ* fusion was carried by plasmid pGR141, while the *cepS-lacZ* fusion was carried by pGR146.

b: Coordinates of the two fusions are calculated relative to the *cepR2* and *cepS* translation start sites, respectively.

c: All strains are derivatives of K56-I2, and therefore have mutations in *cepl*.

## SUPPLEMENTARY MATERIAL

**Table S2.** Bacterial strains used in this study.

| Strain                                  | Description                                                                                                                                                                                                        | Source and/or reference        |
|-----------------------------------------|--------------------------------------------------------------------------------------------------------------------------------------------------------------------------------------------------------------------|--------------------------------|
| <b><i>B. cenocepacia</i></b>            |                                                                                                                                                                                                                    |                                |
| K56-I2                                  | <i>B. cenocepacia</i> K56-2 <i>cepI::TpR</i>                                                                                                                                                                       | (Lewenza <i>et al.</i> , 1999) |
| GR141                                   | K56-I2, $\Delta$ <i>cepR2</i> , <i>cepI::TpR</i>                                                                                                                                                                   | This study                     |
| GR145                                   | K56-I2, $\Delta$ <i>cepS</i> , <i>cepI::TpR</i>                                                                                                                                                                    | This study                     |
| <b><i>E. coli</i></b>                   |                                                                                                                                                                                                                    |                                |
| DH5 $\alpha$                            | F- $\phi$ 80 <i>lacZ</i> $\Delta$ M15 $\Delta$ ( <i>lacZYA-argF</i> ) U169 <i>recA1 endA1 hsdR17</i> ( <i>rk-</i> , <i>mk+</i> ) <i>phoA supE44 <math>\lambda</math>-thi-1 gyrA96 relA1</i>                        | Stratagene                     |
| BL21(DE3)                               | <i>Plac</i> -gene 1 of bacteriophage T7; pTet-TVMV protease, Km <sup>R</sup>                                                                                                                                       | (Studier <i>et al.</i> , 1990) |
| MC4100                                  | F- <i>araD139</i> $\Delta$ ( <i>argF-lac</i> )U169 <i>rpsL150 relA1 deoC1 rbsR fthD5301 fruA25 <math>\lambda</math>-</i>                                                                                           | (Ferenci <i>et al.</i> , 2009) |
| SM10( $\lambda$ <i>pir</i> )            | $\lambda$ <i>pir</i> , RP4 <i>tra</i> regulon, host for <i>pir</i> -dependent plasmids; Kan <sup>R</sup>                                                                                                           | (Donnenberg & Kaper, 1991)     |
| EPM <sub>ax</sub> 10B                   | F- <i>mcrA</i> $\Delta$ ( <i>mrr-hsdRMS-mcrBC</i> ) 80 <i>dlacZ</i> $\Delta$ M15 $\Delta$ <i>lacX74 deoR recA1 endA1 araD139</i> $\Delta$ ( <i>ara, leu</i> )7697 <i>galU galK rpsL nupG <math>\lambda</math>-</i> | (Barrett <i>et al.</i> , 2008) |
| <b><i>Agrobacterium tumefaciens</i></b> |                                                                                                                                                                                                                    |                                |
| WCF47(pCF218) (pCF372)                  | R10 $\Delta$ <i>tral</i> ; <i>PtetR-traR</i> , <i>Ptral-lacZ</i> fusion; Tet <sup>R</sup> , Sp <sup>R</sup>                                                                                                        | (Fuqua & Winans 1994)          |

## SUPPLEMENTARY MATERIAL

**Table S3.** Plasmids used in this study.

| Plasmid               | Description                                                                                                                         | Source and/or reference         |
|-----------------------|-------------------------------------------------------------------------------------------------------------------------------------|---------------------------------|
| pRSETa                | T7 promoter cloning vector, ColE1 ori, Ap <sup>R</sup>                                                                              | Invitrogen                      |
| pT7- <i>groESL</i>    | PT7- <i>groESL</i> , ColE1; Cm <sup>R</sup>                                                                                         | (Yasukawa <i>et al.</i> , 1995) |
| pYWN302               | Broad host range, promoterless transcriptional <i>lacZYA</i> reporter, Tet <sup>R</sup>                                             | (Wei <i>et al.</i> , 2011)      |
| pSRKGm                | pBBR1MCS-2-derived broad-host range expression vector containing <i>lac</i> promoter; Gm                                            | (Khan <i>et al.</i> , 2008)     |
| pSRKKm                | pBBR1MCS-2-derived broad-host range expression vector containing <i>lac</i> promoter; Kan <sup>R</sup>                              | (Khan <i>et al.</i> , 2008)     |
| pEX18Tet- <i>pheS</i> | Suicide plasmid for gene replacement based on <i>pheS</i> and Tet <sup>R</sup>                                                      | (Barrett <i>et al.</i> , 2008)  |
| pSW208                | pACYC184-derived plasmid containing <i>lac</i> promoter; Cm <sup>R</sup>                                                            | Lab collection                  |
| pGR107                | <i>cepR2</i> cloned into <i>NdeI</i> and <i>XhoI</i> sites of pRSETa using oligonucleotides GR295 and GR288.                        | This study                      |
| pGR132                | PCR fragment using oligonucleotides GR280 and GR284 cloned into pYWN302 at KpnI and XbaI sites; <i>bcam0191-lacZ</i> fusion.        | This study                      |
| pGR133                | PCR fragment using oligonucleotides GR281 and GR284 cloned into pYWN302 at KpnI and XbaI sites; <i>bcam0191-lacZ</i> fusion.        | This study                      |
| pGR134                | PCR fragment using oligonucleotides GR279 and GR284 cloned into pYWN302 KpnI and XbaI sites; <i>bcam0191-lacZ</i> fusion            | This study                      |
| pGR136                | PCR fragment using oligonucleotides GR196 and GR191 cloned into pYWN302 at KpnI and XbaI sites; <i>bcam0192-lacZ</i> fusion.        | This study                      |
| pGR137                | PCR fragment using oligonucleotides GR195 and GR191 cloned into pYWN302 at KpnI and XbaI sites; <i>bcam0192-lacZ</i> fusion         | This study                      |
| pGR138                | PCR fragment using oligonucleotides GR194 and GR191 cloned into pYWN302 at KpnI and XbaI sites; <i>bcam0192-lacZ</i> fusion         | This study                      |
| pGR139                | PCR fragment using oligonucleotides GR193 and GR191 cloned into pYWN302 at KpnI and XbaI sites; <i>bcam0192-lacZ</i> fusion         | This study                      |
| pGR140                | PCR fragment using oligonucleotides GR192 and GR191 cloned into pYWN302 at KpnI and XbaI sites; <i>bcam0192-lacZ</i> fusion.        | This study                      |
| pGR141                | PCR fragment using oligonucleotides GR197 and GR202 cloned into pYWN302 at KpnI and XbaI sites; <i>cepR2-lacZ</i> fusion.           | This study                      |
| pGR146                | PCR fragment using oligonucleotides GR203 and GR208 cloned into pYWN302 at KpnI and XbaI sites; <i>cepS-lacZ</i> fusion.            | This study                      |
| pGR178                | PCR fragment made using GR329, GR330, GR331, and GR332, cloned into pEX18Tet- <i>pheS</i> ; <i>cepR2</i> deletion with flanking DNA | This study                      |
| pGR182                | PCR fragment made using GR345, GR346, GR347, and GR348 cloned into pEX18Tet- <i>pheS</i> ; <i>cepS</i> deletion with flanking DNA.  | This study                      |
| pGR192                | pSRKKm derivative containing <i>cepR2</i> using GR288 and GR295.                                                                    | This study                      |
| pGR193                | pSRKGm derivative containing <i>cepS</i> using GR322 and GR323                                                                      | This study                      |

## SUPPLEMENTARY MATERIAL

|        |                                                                                                                                                             |            |
|--------|-------------------------------------------------------------------------------------------------------------------------------------------------------------|------------|
| pGR195 | PCR fragment using oligonucleotides GR292 and GR284 cloned into pYWN302 at KpnI and XbaI sites; <i>bcam0191-lacZ</i> fusion                                 | This study |
| pGR197 | PCR fragment using oligonucleotides GR293 and GR284 cloned into pYWN302 at KpnI and XbaI sites; <i>bcam0191-lacZ</i> fusion                                 | This study |
| pGR198 | PCR fragment using oligonucleotides GR294 and GR284 cloned into pYWN302 at KpnI and XbaI sites; <i>bcam0191-lacZ</i> fusion                                 | This study |
| pGR236 | PCR fragment using oligonucleotides GR275 and GR283 cloned into pYWN302 at KpnI and XbaI sites; <i>bcam0191-lacZ</i> fusion                                 | This study |
| pGR243 | PCR fragment using oligonucleotides GR196 and GR380 cloned into pYWN302 at KpnI and XbaI sites; <i>bcam0192-lacZ</i> fusion                                 | This study |
| pGR259 | PCR fragment using oligonucleotides GR392 and GR284 cloned into pYWN302 at KpnI and XbaI sites; <i>bcam0191-lacZ</i> fusion with altered CepR2 binding site | This study |
| pGR260 | PCR fragment using oligonucleotides GR393 and GR284 cloned into pYWN302 at KpnI and XbaI sites; <i>bcam0191-lacZ</i> fusion with altered CepR2 binding site | This study |
| pGR261 | PCR fragment using oligonucleotides GR394 and GR284 cloned into pYWN302 at KpnI and XbaI sites; <i>bcam0191-lacZ</i> fusion with altered CepR2 binding site | This study |
| pGR276 | pSW208 derivative containing <i>cepS</i> using GR323 and GR417                                                                                              | This study |

**SUPPLEMENTARY MATERIAL**

**Table S4.** Oligonucleotides used in this study.

| Name  | Sequence                       | Comments                                                                                                                                      |
|-------|--------------------------------|-----------------------------------------------------------------------------------------------------------------------------------------------|
| GR191 | ATTTCTAGACGAATACGTGCCATTCCATG  | For PCR amplifying <i>bcam0192</i> promoters in pGR136, pGR137, pGR138, pGR139, and pGR140 and Fragment 3.                                    |
| GR192 | ATTGGTACCCGTGAAATTGCTGC        | For PCR amplifying of <i>bcam0192</i> promoter in pGR140.                                                                                     |
| GR193 | ATTGGTACCTGGATGGATGAGGAGTCTG   | For PCR amplifying Fragment 3 and pGR139                                                                                                      |
| GR194 | ATTGGTACCTTGCGGATGTCAATTCC     | For PCR amplifying of <i>bcam0192</i> promoter in pGR138.                                                                                     |
| GR195 | ATTGGTACCTCGCATCGTGCATTTTC     | For PCR amplifying of <i>bcam0192</i> promoter in pGR137.                                                                                     |
| GR196 | ATTGGTACCTCACGTCGTTTCTCCTG     | For PCR amplifying <i>bcam0192</i> promoter in pGR136 and pGR243                                                                              |
| GR197 | ATTTCTAGACGACGATCTGCATGTCG     | For PCR amplifying <i>cepR2</i> promoter in pGR141                                                                                            |
| GR202 | ATTGGTACCGTCGATCAGTCCTGATAC    | For PCR amplifying <i>cepR2</i> promoter in pGR141                                                                                            |
| GR203 | ATTGGTACCCATACTCGTGAGCAAGC     | For PCR amplifying <i>cepS</i> promoter in pGR146                                                                                             |
| GR208 | ATTTCTAGAATCGGTGATCCTCG        | For PCR amplifying <i>cepS</i> promoter in pGR146                                                                                             |
| GR275 | GCTTCTAGAGGTGGATGAATTAAATGC    | For PCR amplifying <i>bcam0191</i> promoter in pGR236                                                                                         |
| GR279 | ATTGGTACCATGAAATGCACGATGCG     | For PCR amplifying <i>bcam0191</i> promoter in pGR134                                                                                         |
| GR280 | ATTGGTACCCCTCATCCATCCATCAA     | For PCR amplifying <i>bcam0191</i> promoter in pGR132                                                                                         |
| GR281 | ATTGGTACCATCGGGCTGTCTAGGATAAG  | For PCR amplifying <i>bcam0191</i> promoter in pGR133                                                                                         |
| GR283 | ATTGGTACCGACTCTCCTAGTAATGTCC   | For PCR amplifying <i>bcam0191</i> promoter in pGR130, pGR236.                                                                                |
| GR284 | ATTTCTAGAGCGTAGATATGCGTCGAC    | For PCR amplifying <i>bcam0191</i> promoters in pGR130, pGR132, pGR133, pGR134, pGR195, pGR197, pGR198, pGR259, pG260, pGR261 and Fragment 1. |
| GR288 | ATTCTCGAGTTTTTTCACGTCACGG      | For amplifying <i>cepR2</i> for cloning into pGR107 and pGR192                                                                                |
| GR292 | ATTGGTACCTACTGGAAAGGCTTTGACGCA | For PCR amplifying <i>bcam0191</i> promoter in pGR195                                                                                         |
| GR293 | ATTGGTACCCGCACGGAATTGACATC     | For PCR amplifying <i>bcam0191</i> promoter in pGR197                                                                                         |
| GR294 | ATTGGTACCCCGCAAATCGGGCTGTC     | For PCR amplifying <i>bcam0191</i> promoter in pGR198                                                                                         |
| GR295 | GGAATTCCATATGGACCTGACAATACTG   | For amplifying of <i>cepR2</i> for cloning into pGR192 and pGR107                                                                             |
| GR301 | CCTCTTCGCTATTACGCCAGC          | For PCR amplifying of <i>lacZ</i> fragment for negative control for EMSA experiments                                                          |
| GR302 | CGTTACCCAACTTAATCG             | For PCR amplifying of <i>lacZ</i> fragment for negative control for EMSA experiments                                                          |
| GR322 | GGAATTCCATATGACCAGCGTTCAAGACG  | For PCR amplifying <i>cepS</i> for cloning into pGR193                                                                                        |
| GR323 | CCCAAGCTTGATCGTGCATGCGATC      | For PCR amplifying <i>cepS</i> for cloning into pGR193 and pGR276.                                                                            |
| GR324 | GATCGTGCATGCGATC               | For sequence verification of <i>cepR2</i> deletion                                                                                            |
| GR328 | GCATGCGTCTTGTTCATCGC           | For sequence verification of <i>cepS</i> deletion                                                                                             |

## SUPPLEMENTARY MATERIAL

|       |                                               |                                                                                                      |
|-------|-----------------------------------------------|------------------------------------------------------------------------------------------------------|
| GR329 | ACTAAGCTTCTGCAGTCGCTCGCACAGCTT                | With GR330, GR331, and GR332, for construction of <i>cepR2</i> deletion fragment cloned into pGR178. |
| GR330 | ATTGAATTCTTGCAGTATTGTCAGGTCCATC               | With GR329, GR331, and GR332, for construction of <i>cepR2</i> deletion fragment cloned into pGR178. |
| GR331 | ATTGAATTCTCGACGCGATGAACAAGAC                  | With GR329, GR330, and GR332, for construction of <i>cepR2</i> deletion fragment cloned into pGR178. |
| GR332 | ACTTCTAGAGCACGTACGATTCGATCATTCGC              | With GR329, GR330, and GR331, for construction of <i>cepR2</i> deletion fragment cloned into pGR178. |
| GR345 | ATGGATCCGAACGCATTCCATACGACC                   | With GR346, GR347, and GR348, for construction of <i>cepS</i> deletion fragment cloned into pGR182.  |
| GR346 | GCACTAGTGATCAGTCCTGATACGAAACCG                | With GR345, GR347, and GR348, for construction of <i>cepS</i> deletion fragment cloned into pGR182.. |
| GR347 | GCACTAGTGATCGCATGCACGATCCG                    | With GR345, GR346, and GR348, for construction of <i>cepS</i> deletion fragment cloned into pGR182.. |
| GR348 | CGGAATTCGACATCATGTGCTTGCC                     | With GR345, GR346, and GR347, for construction of <i>cepS</i> deletion fragment cloned into pGR182.. |
| GR351 | ATTTCTAGACATATTCGCATCGTGCATTTTC               | For PCR amplifying Fragments 2, 4, and 5                                                             |
| GR365 | ATTTCTAGAGGATAAGAATTGCGATTCATC                | For PCR amplifying Fragment 1                                                                        |
| GR380 | ATTTCTAGATTCCGGCGCCGGAAACCGTTT                | For PCR amplification of <i>bcam0192</i> promoter in pGR243                                          |
| GR391 | ATGGTACCCGCACGGAATTGACATCCGCAA<br>ATCGGGCTGTC | For PCR amplifying Fragment 2                                                                        |
| GR392 | ATGGTACCCGCACGGAATTCTGATCCGCAA<br>ATCGGGCTGTC | For PCR amplification of <i>bcam0191</i> promoter in pGR259 and Fragment 4                           |
| GR393 | ATGGTACCCGCACGGAATTGACTAGGGCAAA<br>TCGGGCTGTC | For PCR amplification of <i>bcam0191</i> promoter in pGR260 and Fragment 5                           |
| GR394 | ATGGTACCCGCACGGAATTGACATCCCGTT<br>ATCGGGCTGTC | For PCR amplification of <i>bcam0191</i> promoter in pGR261                                          |
| GR417 | ATGAATTCAGGAGGCGATAGATGACCAGCG<br>TTCAAGA     | For PCR amplifying <i>cepS</i> and cloning into pGR276                                               |
| GR458 | 6-FAM-ATCGGTCACGTCGTTTCTCC                    | For mapping <i>bcam0191</i> promoter and DNA footprinting analysis                                   |
| GR459 | 6-FAM-AATTGCCTGCATGCCGT                       | For mapping <i>bcam0192</i> promoter                                                                 |

## SUPPLEMENTARY MATERIAL

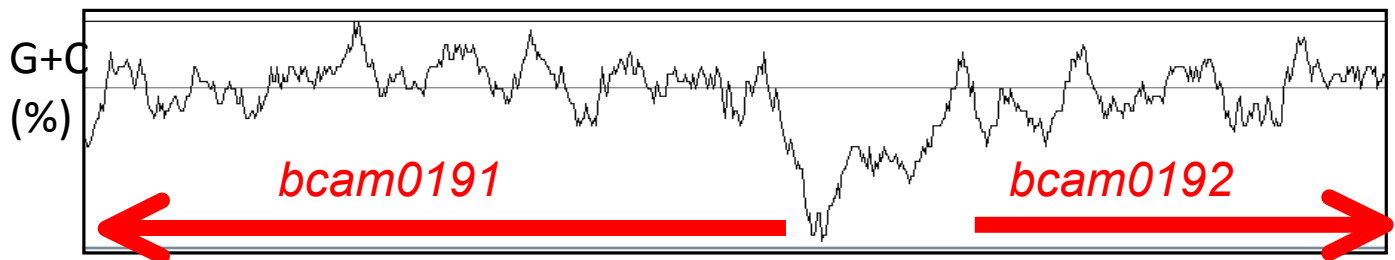

**Fig. S1.** G/C content of *bcam0191*, *bcam0192*, and the intergenic region between them, using a sliding window of 15 nucleotides. The intergenic region contains a significantly A/T-rich sequence.

SUPPLEMENTARY MATERIAL

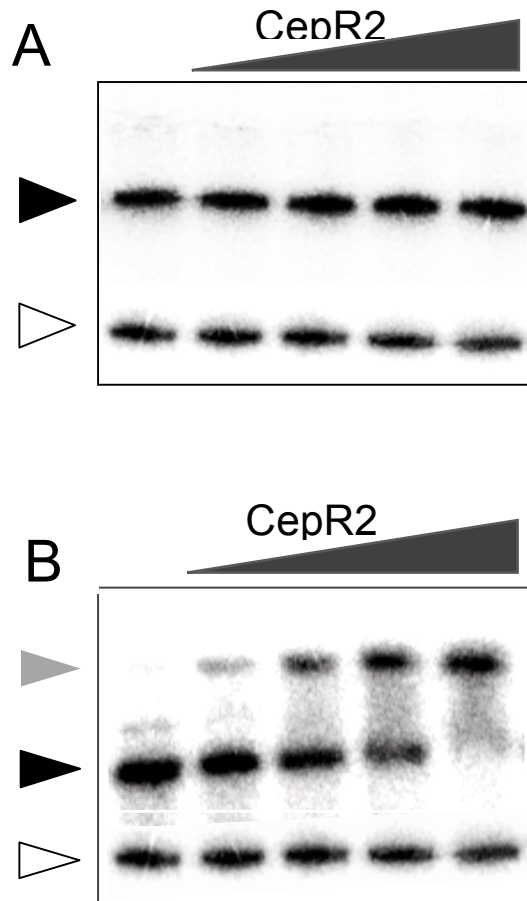

**Fig. S2.** CepR2 does not detectably shift a DNA fragment containing the *cepR2-cepS* intergenic region. A: A 197 nucleotide DNA fragment containing the entire *cepR2-cepS* intergenic region. B: DNA fragment containing the *bcam0191-bcam0192* intergenic region (see Fig. 6, fragment 2). Filled arrowheads show free DNA. Grey arrowhead shows CepR2-DNA complex. Open arrowheads show a negative control fragment containing *lacZ* DNA.



SUPPLEMENTARY MATERIAL

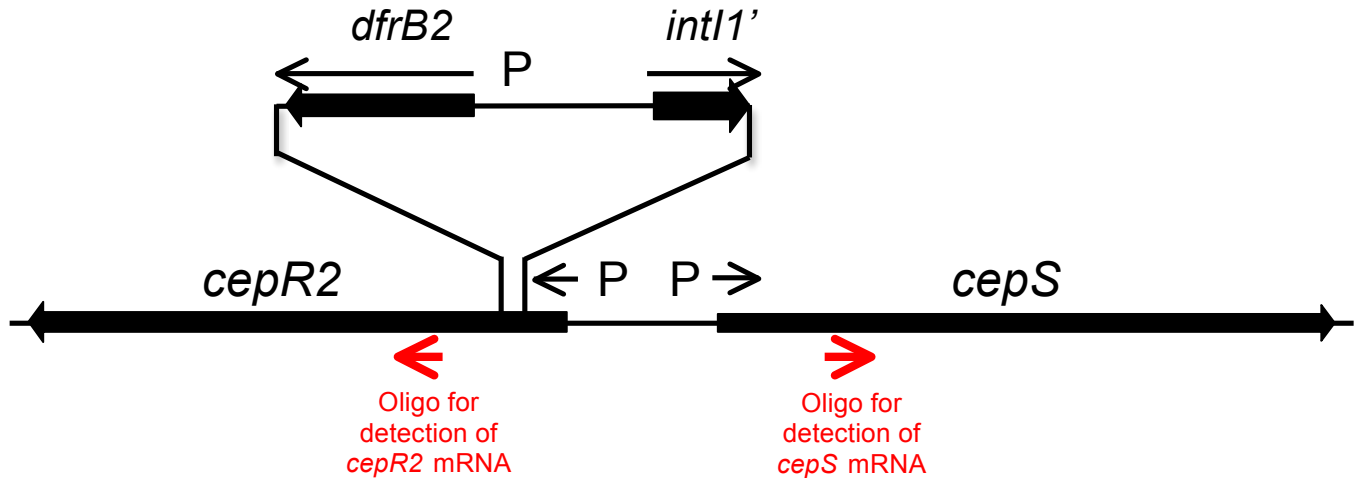

**Fig. S3.** In the study of Malott and colleagues, an approximately 620-nucleotide fragment containing *dfrB2* (trimethoprim resistance) and *int11'* (5' end of the *int11* integrase gene of plasmid R388) was inserted into a gap in *cepR2* created by digestion with *SacII* (which digests sites at two sites 54 and 87 nucleotides downstream from the *cepR2* start codon (Malott *et al.*, 2009). The orientation of the insertion was not described. Divergent promoters in this cassette (DeShazer & Woods, 1996) could have caused elevated expression of *cepS* gene and of that portion of *cepR2* downstream of the insertion.

*CepR2* mRNA was detected using oligonucleotide

5'-CGGCAATCATCCACGCGAATGGGAACACCGTTATGTGAAATTCGGCTACGTCACCATCGA-3', which is located 167-227 downstream of the *cepR2* translation start site.

*CepS* mRNA was detected using oligonucleotide

5'-GGCCGGGCAACTATTGTTTACGACGCGCGGCGTATTAGTACTCGACGTCGAAGGCCAGCG-3', which is located 142-203 nucleotides downstream of the *cepS* translation start site.

## SUPPLEMENTARY MATERIAL

### References

- Barrett, A.R., Kang, Y., Inamasu, K.S., Son, M.S., Vukovich, J.M. and Hoang, T.T. (2008) Genetic tools for allelic replacement in *Burkholderia* species. *Appl Environ Microbiol* **74**: 4498-4508.
- DeShazer, D. and Woods, D.E. (1996) Broad-host-range cloning and cassette vectors based on the R388 trimethoprim resistance gene. *Biotechniques* **20**: 762-764.
- Donnenberg, M.S. and Kaper, J.B. (1991) Construction of an *eae* deletion mutant of enteropathogenic *Escherichia coli* by using a positive-selection suicide vector. *Infect Immun* **59**: 4310-4317.
- Ferenci, T., Zhou, Z., Betteridge, T., Ren, Y., Liu, Y., Feng, L., Reeves, P.R. and Wang, L. (2009) Genomic sequencing reveals regulatory mutations and recombinational events in the widely used MC4100 lineage of *Escherichia coli* K-12. *J Bacteriol* **191**: 4025-4029.
- Fuqua, W.C. and Winans, S.C. (1994) A LuxR-LuxI type regulatory system activates *Agrobacterium* Ti plasmid conjugal transfer in the presence of a plant tumor metabolite. *J Bacteriol* **176**: 2796-2806.
- Khan, S.R., Gaines, J., Roop, R.M., 2nd and Farrand, S.K. (2008) Broad-host-range expression vectors with tightly regulated promoters and their use to examine the influence of TraR and TraM expression on Ti plasmid quorum sensing. *Appl Environ Microbiol* **74**: 5053-5062.
- Lewenza, S., Conway, B., Greenberg, E.P. and Sokol, P.A. (1999) Quorum sensing in *Burkholderia cepacia*: Identification of the LuxRI homologs CepRI. *J Bacteriol* **181**: 748-756.
- Malott, R.J., O'Grady, E.P., Toller, J., Inhulsen, S., Eberl, L. and Sokol, P.A. (2009) A *Burkholderia cenocepacia* orphan LuxR homolog is involved in quorum-sensing regulation. *J Bacteriol* **191**: 2447-2460.
- Studier, F.W., Rosenberg, A.H., Dunn, J.J. and Dubendorff, J.W. (1990) Use of T7 RNA polymerase to direct expression of cloned genes. *Methods Enzymol* **185**: 60-89.
- Wei, Y., Ryan, G.T., Flores-Mireles, A.L., Costa, E.D., Schneider, D.J. and Winans, S.C. (2011) Saturation mutagenesis of a CepR binding site as a means to identify new quorum-regulated promoters in *Burkholderia cenocepacia*. *Mol Microbiol* **79**: 616-632.
- Yasukawa, T., Kanei-Ishii, C., Maekawa, T., Fujimoto, J., Yamamoto, T. and Ishii, S. (1995) Increase of solubility of foreign proteins in *Escherichia coli* by coproduction of the bacterial thioredoxin. *J Biol Chem* **270**: 25328-25331.
